# Supplementary material
Source: PubMed Central journal article supplement (PMC7771746)
Supplement: EMP2-1-1380-s001.pdf [file EMP2-1-1380-s001.pdf]

| Days between index visit and ED revisit^ | Days between index visit and hospital admission | Days between index visit and hospital visit that included ICU stay | Oxygen Saturation at index visit | Oxygen Saturation at ED revisit^ | COVID PCR test results positive during 30-day follow-up period | Description of symptoms on index visit; any observations about progression over time before the ED re-visit | Patient's reason for the ED re-visit         |
|------------------------------------------|-------------------------------------------------|--------------------------------------------------------------------|----------------------------------|----------------------------------|----------------------------------------------------------------|-------------------------------------------------------------------------------------------------------------|----------------------------------------------|
| 1                                        | 1                                               | -                                                                  | 97                               | 97                               | negative                                                       | sore throat, fever, body aches, chest tightness                                                             | new tingling and color change in one arm     |
| 2                                        | 2                                               | -                                                                  | 99                               | 93                               | positive                                                       | fever, cough, shortness of breath; sat 93% on arrival of 2nd visit, as low as 87% on room air               | worsening shortness of breath and hypoxia    |
| 2                                        | 2                                               | -                                                                  | 93                               | 96                               | positive                                                       | cough, sore throat, fever; returned sent by PMD for worsening dyspnea and bnilateral infiltrates            | worsening shortness of breath                |
| 2                                        | 2                                               | -                                                                  | 98                               | 100                              | negative                                                       | cough, chills, shortness of breath, sore throat; 2nd visit transferred for acute on chronic heart failure   | worsening shortness of breath                |
| 3                                        | 3                                               | -                                                                  | 95                               | 93                               | positive                                                       | fever, fatigue, cough shortnes of breath, diarrhea                                                          | worsening shortness of breath and fatigue    |
| 3                                        | 3                                               | -                                                                  | 94                               | -                                | positive                                                       | fever, chills, malaise, sore throat, cough; admitted to outside hospital                                    | N/A                                          |
| 4                                        | 4                                               | -                                                                  | 98                               | 96                               | negative                                                       | cough, shortness of breath, fever, lightheadedness, syncope; 2nd visit pneumonia, also vomiting             | persistent cough, new vomiting               |
| 4                                        | 4                                               | -                                                                  | 97                               | 93                               | positive                                                       | cough, fever, body aches; worsening symptoms including orthopnea                                            | worsening shortness of breath, new orthopnea |

| Days between index visit and ED revisit^ | Days between index visit and hospital admission | Days between index visit and hospital visit that included ICU stay | Oxygen Saturation at index visit | Oxygen Saturation at ED revisit^ | COVID PCR test results positive during 30-day follow-up period | Description of symptoms on index visit; any observations about progression over time before the ED re-visit | Patient's reason for the ED re-visit                                 |
|------------------------------------------|-------------------------------------------------|--------------------------------------------------------------------|----------------------------------|----------------------------------|----------------------------------------------------------------|-------------------------------------------------------------------------------------------------------------|----------------------------------------------------------------------|
| 3                                        | 5                                               | 5                                                                  | 98                               | 94                               | positive                                                       | fever, body aches and cough; 2nd visit sat 94, 3rd sat 88%. ICU admit with intubation; now discharged home  | worsening shortness of breath                                        |
| 5                                        | 5                                               | -                                                                  | 98                               | 97                               | positive                                                       | sore throat, fever, dry cough, fatigue; persistent fever and cough                                          | persistent fever and cough; preference of primary physician to admit |
| 5                                        | 5                                               | -                                                                  | 96                               | 92                               | positive                                                       | shortness of breath, fever, chills; worsening shortness of breath                                           | worsening shortness of breath                                        |
| 5                                        | 5                                               | -                                                                  | 99                               | 93                               | positive                                                       | fever, cough, malaise, body aches; persistent fever x 1 week                                                | persistent fever                                                     |
| 5                                        | 5                                               | -                                                                  | 100                              | 95                               | positive                                                       | fever, myalgia, nausea, dry cough; worsening shortness of breath and vomiting; desat to 90% in ED           | worsening shortness of breath, nausea and vomiting                   |
| 5                                        | 5                                               | 5                                                                  | 93                               | 92                               | positive                                                       | cough fever and wheezing; worsening dyspnea, then ICU requiring high-flow oxygen                            | worsening shortness of breath                                        |
| 6                                        | 6                                               | -                                                                  | 97                               | 92                               | positive                                                       | fever cough malaise shortness of breath body aches                                                          | worsening shortness of breath                                        |
| 4                                        | 7                                               | -                                                                  | 97                               | 100                              | positive                                                       | cough and dyspnea; then returned for vomiting. Admitted for enteritis                                       | vomiting and inability to tolerate po                                |

| Days between index visit and ED revisit^ | Days between index visit and hospital admission | Days between index visit and hospital visit that included ICU stay | Oxygen Saturation at index visit | Oxygen Saturation at ED revisit^ | COVID PCR test results positive during 30-day follow-up period | Description of symptoms on index visit; any observations about progression over time before the ED re-visit | Patient's reason for the ED re-visit           |
|------------------------------------------|-------------------------------------------------|--------------------------------------------------------------------|----------------------------------|----------------------------------|----------------------------------------------------------------|-------------------------------------------------------------------------------------------------------------|------------------------------------------------|
| 7                                        | 7                                               | -                                                                  | 98                               | 96                               | positive                                                       | fever, body aches, cough and one RR documented at 34 on initial; sat 90-96% in ED 2nd visit                 | worsening shortness of breath                  |
| 7                                        | 7                                               | -                                                                  | 97                               | 97                               | N/A                                                            | fever, myalgia, cough, shortness of breath, headache, abd pain; transferred to OH for PO intolerance        | worsening cough and vomiting, po intolerance   |
| 9                                        | 9                                               | -                                                                  | 96                               | 93                               | positive                                                       | fever, body ache, sore throat, fatigue; worsening shortness of breath                                       | worsening shortness of breath                  |
| 10                                       | 10                                              | -                                                                  | 100                              | 99                               | negative                                                       | fatigue, body ache, sob, fever; then admitted for pancreatitis                                              | worsening abd pain, found to have pancreatitis |
| 18                                       | 18                                              | 18                                                                 | 99                               | hypoxic*                         | positive                                                       | cough and fever, body aches; severe shortness of breath, paramedics, ICU at outside hospital                | worsening shortness of breath                  |
| 0.5                                      | -                                               | -                                                                  | 100                              | 100                              | N/A                                                            | cough, rhinorrhea, chest tightness, fever                                                                   | worsening shortness of breath                  |
| 0.5                                      | -                                               | -                                                                  | 98                               | 97                               | N/A                                                            | cough, shortness of breath, subjective fever; worsening shortness of breath. ?secondary gain                | worsening shortness of breath                  |
| 1                                        | -                                               | -                                                                  | 98                               | 97                               | N/A                                                            | fever, cough, generalized weakness. On 2nd visit reports nighttime headache                                 | new headache                                   |

| Days between index visit and ED revisit^ | Days between index visit and hospital admission | Days between index visit and hospital visit that included ICU stay | Oxygen Saturation at index visit | Oxygen Saturation at ED re-visit^ | COVID PCR test results positive during 30-day follow-up period | Description of symptoms on index visit; any observations about progression over time before the ED re-visit                                                  | Patient's reason for the ED re-visit           |
|------------------------------------------|-------------------------------------------------|--------------------------------------------------------------------|----------------------------------|-----------------------------------|----------------------------------------------------------------|--------------------------------------------------------------------------------------------------------------------------------------------------------------|------------------------------------------------|
| 1                                        | -                                               | -                                                                  | 100                              | 99                                | negative                                                       | sore throat, runny nose, cough, hemoptysis; worsening chest tightness                                                                                        | worsening chest tightness                      |
| 1                                        | -                                               | -                                                                  | 99                               | 97                                | negative                                                       | fever, headache, shortness of breath, cough; 7 visits in 2 weeks                                                                                             | worsening shortness of breath, chest tightness |
| 1                                        | -                                               | -                                                                  | 100                              | 100                               | positive                                                       | cough, weakness, fatigue, sore throat                                                                                                                        | worsening chest tightness                      |
| 1                                        | -                                               | -                                                                  | 97                               | -                                 | N/A                                                            | malaise, diarrhea, fatigue                                                                                                                                   | requesting covid test                          |
| 1                                        | -                                               | -                                                                  | 96                               | 95                                | N/A                                                            | cough and fever, decreased taste                                                                                                                             | worsening shortness of breath                  |
| 1                                        | -                                               | -                                                                  | 100                              | 100                               | N/A                                                            | nasal congestion, loss of taste                                                                                                                              | worsening chest tightness, shortness of breath |
| 2                                        | -                                               | -                                                                  | 97                               | 98                                | positive                                                       | cough, congestion, shortness of breath; worsening shortness of breath. Worsening dyspnea and chest pain; 3 bounceback ED visits, discharged home all 3 times | worsening shortness of breath                  |
| 2                                        | -                                               | -                                                                  | 100                              | 96                                | positive                                                       | body aches, sore throat, cough, mild dyspnea; 2nd visit for lightheadedness, febrile to 103 and tachycardic                                                  | lightheadedness and fever                      |
| 2                                        | -                                               | -                                                                  | 100                              | 98                                | N/A                                                            | shortness of breath; persistent shortness of breath                                                                                                          | persistent shortness of breath                 |

| Days between index visit and ED revisit^ | Days between index visit and hospital admission | Days between index visit and hospital visit that included ICU stay | Oxygen Saturation at index visit | Oxygen Saturation at ED revisit^ | COVID PCR test results positive during 30-day follow-up period | Description of symptoms on index visit; any observations about progression over time before the ED re-visit | Patient's reason for the ED re-visit                    |
|------------------------------------------|-------------------------------------------------|--------------------------------------------------------------------|----------------------------------|----------------------------------|----------------------------------------------------------------|-------------------------------------------------------------------------------------------------------------|---------------------------------------------------------|
| 2                                        | -                                               | -                                                                  | 98                               | 97                               | positive                                                       | cough, chills, night sweats; persistent fever; healthcare worker requesting testing                         | healthcare worker requesting testing                    |
| 2                                        | -                                               | -                                                                  | 100                              | 99                               | N/A                                                            | cough, fever, chills, body aches                                                                            | persistent cough                                        |
| 3                                        | -                                               | -                                                                  | 98                               | 100                              | negative                                                       | myalgias cough fever headache; returns for worse shortness of breath and cough; new chest pain              | worsening shortness of breath and cough; new chest pain |
| 3                                        | -                                               | -                                                                  | 96                               | 99                               | N/A                                                            | headache, runny nose, cough; req clearance for work                                                         | clearance for work                                      |
| 3                                        | -                                               | -                                                                  | 100                              | 99                               | N/A                                                            | chest pain, lightheadedness, shortness of breath                                                            | persistent chest pain and palpitations                  |
| 4                                        | -                                               | -                                                                  | 100                              | 100                              | positive                                                       | fever, myalgia, cough. 2nd visit for worsening cough and near syncope after coughing fit                    | worse coughing                                          |
| 4                                        | -                                               | -                                                                  | 100                              | 99                               | N/A                                                            | shortness of breath, cough, phlegm; worsening sob                                                           | worsening shortness of breath                           |
| 4                                        | -                                               | -                                                                  | 96                               | 95                               | N/A                                                            | fever cough sob; 2nd visit abdominal pain. found to have infiltrate in area corresponding to pain           | worsening abdominal pain                                |
| 4                                        | -                                               | -                                                                  | 100                              | 97                               | positive                                                       | shortness of breath, malaise                                                                                | worsening shortness of breath                           |

| Days between index visit and ED revisit^ | Days between index visit and hospital admission | Days between index visit and hospital visit that included ICU stay | Oxygen Saturation at index visit | Oxygen Saturation at ED revisit^ | COVID PCR test results positive during 30-day follow-up period | Description of symptoms on index visit; any observations about progression over time before the ED re-visit | Patient's reason for the ED re-visit                            |
|------------------------------------------|-------------------------------------------------|--------------------------------------------------------------------|----------------------------------|----------------------------------|----------------------------------------------------------------|-------------------------------------------------------------------------------------------------------------|-----------------------------------------------------------------|
| 4                                        | -                                               | -                                                                  | 95                               | 100                              | N/A                                                            | cough chest pain sore throat subjective fever                                                               | worsening shortness of breath; now loss taste and smell         |
| 5                                        | -                                               | -                                                                  | 97                               | 98                               | N/A                                                            | runny nose, shortness of breath, cough                                                                      | worsening abdominal pain with coughing                          |
| 6                                        | -                                               | -                                                                  | 95                               | 100                              | N/A                                                            | cough; persistent cough                                                                                     | persistent cough                                                |
| 6                                        | -                                               | -                                                                  | 98                               | 94                               | positive                                                       | cough; atypical pneumonia on 2nd visit. Infiltrate in area of back discomfort                               | worsening back pain                                             |
| 7                                        | -                                               | -                                                                  | 100                              | 97                               | N/A                                                            | dyspnea, possible work exposure; seen at outside hospital again for same; not tested either time            | GI upset; anxiety                                               |
| 7                                        | -                                               | -                                                                  | 99                               | 99                               | N/A                                                            | cough, shortness of breath, fever, chills, chest pain, diarrhea, body aches; worsening dyspnea              | worsening shortness of breath                                   |
| 7                                        | -                                               | -                                                                  | 99                               | 99                               | N/A                                                            | cough, shortness of breath, fever                                                                           | persistent cough and shortness of breath                        |
| 7                                        | -                                               | -                                                                  | 98                               | 98                               | N/A                                                            | shortness of breath, wheezing, chest pressure                                                               | new throat discomfort                                           |
| 8                                        | -                                               | -                                                                  | 93                               | 96                               | N/A                                                            | sore throat                                                                                                 | worsening with fever, chest pain, shortness of breath, abd pain |

| Days between index visit and ED revisit^ | Days between index visit and hospital admission | Days between index visit and hospital visit that included ICU stay | Oxygen Saturation at index visit | Oxygen Saturation at ED re-visit^ | COVID PCR test results positive during 30-day follow-up period | Description of symptoms on index visit; any observations about progression over time before the ED re-visit                              | Patient's reason for the ED re-visit              |
|------------------------------------------|-------------------------------------------------|--------------------------------------------------------------------|----------------------------------|-----------------------------------|----------------------------------------------------------------|------------------------------------------------------------------------------------------------------------------------------------------|---------------------------------------------------|
| 9                                        | -                                               | -                                                                  | 97                               | 99                                | negative                                                       | fever, chills, chest tightness, rhonchi on exam                                                                                          | persistent cough                                  |
| 9                                        | -                                               | -                                                                  | 93                               | 99                                | N/A                                                            | shortness of breath and dry cough; worsening shortness of breath                                                                         | worsening shortness of breath                     |
| 9                                        | -                                               | -                                                                  | 95                               | 98                                | N/A                                                            | fatigue, hoarseness, body aches, cough                                                                                                   | worsening shortness of breath and chest tightness |
| 11                                       | -                                               | -                                                                  | 100                              | 99                                | N/A                                                            | sore throat, fever, runny nose; continued symptoms                                                                                       | persistent cough                                  |
| 12                                       | -                                               | -                                                                  | 100                              | 100                               | negative                                                       | cough and shortness of breath; tested negative but had persistent symptoms                                                               | worsening shortness of breath and chest tightness |
| 12                                       | -                                               | -                                                                  | 98                               | 98                                | negative                                                       | sore throat, fever, back pain, shortness of breath; abdominal pain 2nd visit outside hospital; abdominal pain 3rd visit outside hospital | new abdominal pain                                |
| 12                                       | -                                               | -                                                                  | 98                               | 98                                | N/A                                                            | sore throat, headache, cough                                                                                                             | worsening abd pain and nausea                     |
| 16                                       | -                                               | -                                                                  | 98                               | 98                                | negative                                                       | cough and shortness of breath, wheezing                                                                                                  | new fever, persistent symptoms                    |
| 17                                       | -                                               | -                                                                  | 99                               | 97                                | negative                                                       | shortness of breath, cough, headache, fevers                                                                                             | worsening headache                                |

| <b>Days between index visit and ED revisit^</b> | <b>Days between index visit and hospital admission</b> | <b>Days between index visit and hospital visit that included ICU stay</b> | <b>Oxygen Saturation at index visit</b> | <b>Oxygen Saturation at ED re-visit^</b> | <b>COVID PCR test results positive during 30-day follow-up period</b> | <b>Description of symptoms on index visit; any observations about progression over time before the ED re-visit</b> | <b>Patient's reason for the ED re-visit</b> |
|-------------------------------------------------|--------------------------------------------------------|---------------------------------------------------------------------------|-----------------------------------------|------------------------------------------|-----------------------------------------------------------------------|--------------------------------------------------------------------------------------------------------------------|---------------------------------------------|
| 27                                              | -                                                      | -                                                                         | 100                                     | 100                                      | negative                                                              | shortness of breath; presents for worsening headache                                                               | worsening headache                          |
| 30                                              | -                                                      | -                                                                         | 99                                      | 100                                      | negative                                                              | cough and sore throat / panic attack                                                                               | panic attack                                |

^ For patients with multiple ED re-visits, this column denotes only the first ED re-visit

\* Readmission at outside hospital. Information about the case was found in a case management note that lacked initial oxygen saturation

N/A: results not available
